# Supplementary material for: Trithorax dependent changes in chromatin landscape at enhancer and promoter regions drive female puberty
Source: PubMed Central journal article supplement (PMC5754362; doi:10.1038/s41467-017-02512-1), 2018-01-04
Supplement: 41467_2017_2512_MOESM1_ESM.pdf [file 41467_2017_2512_MOESM1_ESM.pdf]

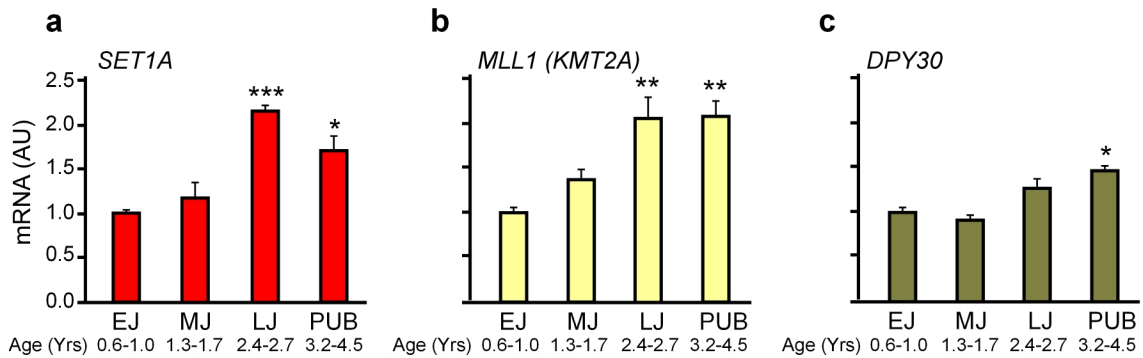

**Supplementary Fig. 1:** Expression of TrxG genes in the immature female rhesus monkey hypothalamus. (a) *SET1A* mRNA; (b) *MLL1 (KMT2A)* mRNA; (c) *DPY30* mRNA. RNA expression data were normalized by dividing each individual value by the average of the EJ group. Bars represent mean  $\pm$  s.e.m. (n=3-7) (\* =  $P < 0.05$ ; \*\* =  $P < 0.01$ , and \*\*\* =  $P < 0.001$  vs EJ group; one-way ANOVA-SNK test. EJ, early juvenile; MJ, midjuvenile; LJ, late juvenile; PUB, peripubertal.

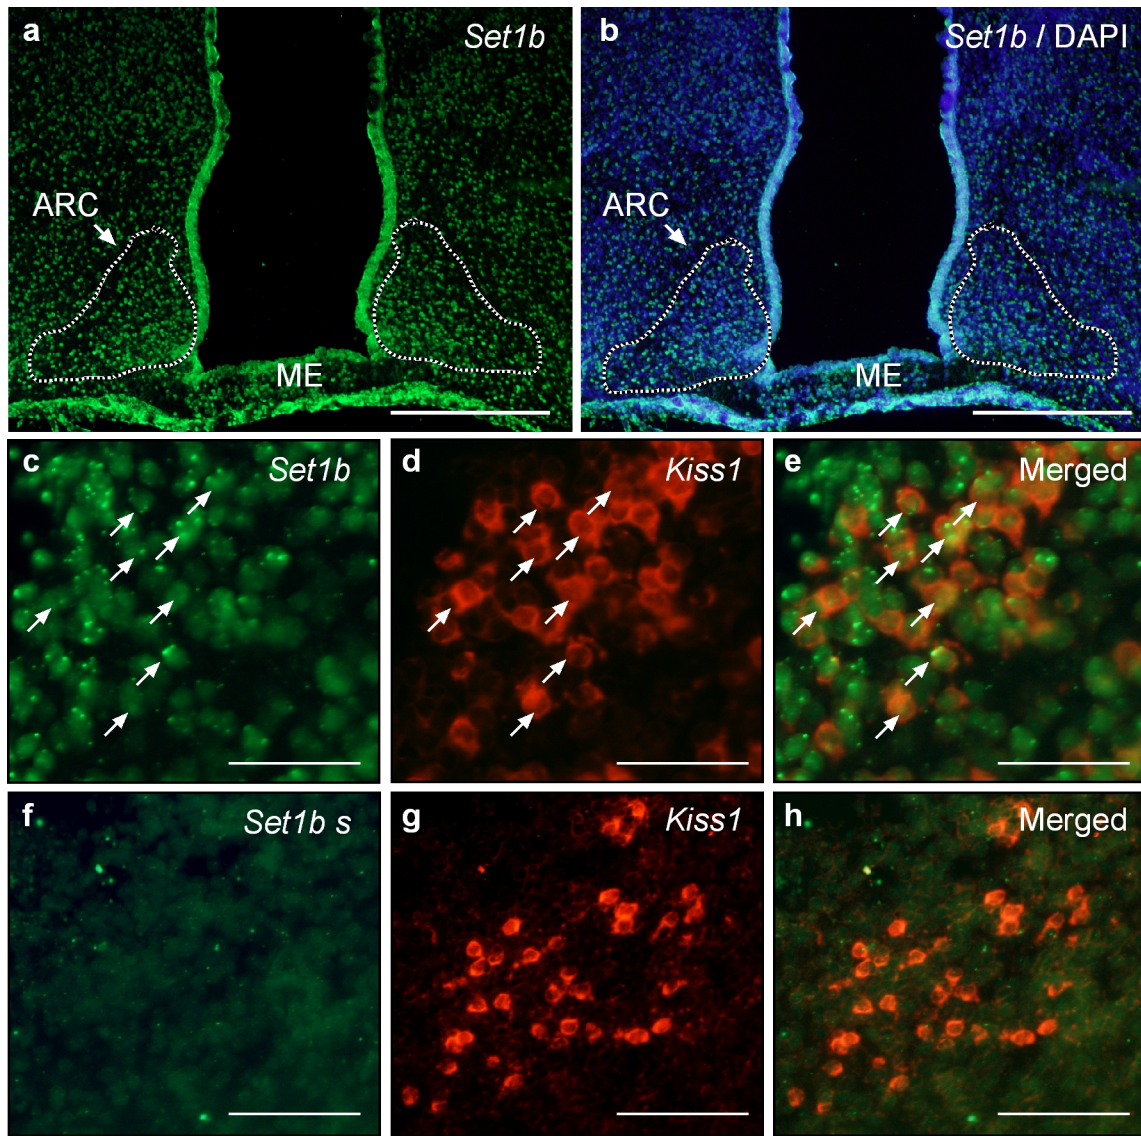

**Supplementary Fig. 2:** *Set1b* mRNA-expressing cells in the prepubertal female rat hypothalamus. (a) Low magnification view depicting the distribution of *Set1b* mRNA-containing cells in the MBH-of LJ female rat as assessed by fluorescent *in situ* hybridization (FISH). The dotted line outlines the boundaries of the ARC. (b) Abundance of *Set1b* mRNA-containing cells (green) in the ARC as assessed by FISH using the DNA marker DAPI (blue) to identify cell nuclei. (c-e) Co-localization of *Set1b* mRNA (green) and *Kiss1* mRNA (red) in KNDy neurons of the ARC. Arrows point to examples of double positive cells. (f-h) Absence of *Set1b* mRNA hybridization in sections incubated with a sense (s) *Set1b* RNA probe (green) and a *Kiss1* cRNA (red). ME = median eminence of the hypothalamus. Bars in a, b = 500  $\mu\text{m}$ ; in c-h = 200  $\mu\text{m}$ .

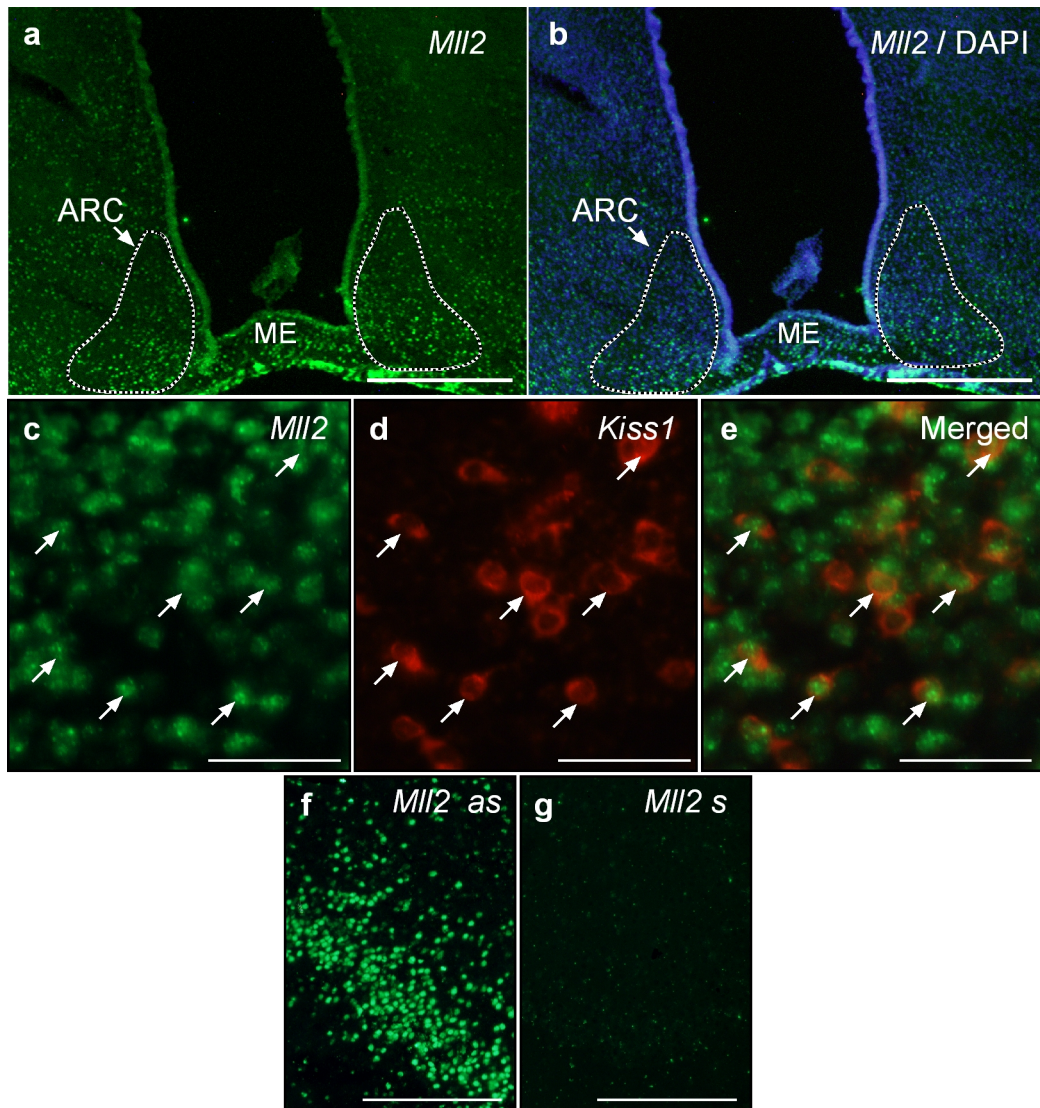

**Supplementary Fig. 3:** *MII2* mRNA- expressing cells in the prepubertal female rat hypothalamus. **(a)** Low magnification view depicting the distribution of *MII2* mRNA-containing cells in the MBH of a LJ female rat as assessed by FISH. The dotted line outlines the boundaries of the ARC. **(b)** Abundance of *MII2* mRNA-containing cells (green) in the ARC as assessed by FISH using the DNA marker DAPI (blue) to identify cell nuclei. **(c-e)** Co-localization of *MII2* mRNA (green) and *Kiss1* mRNA (red) in KNDy neurons of the ARC. Arrows point to examples of double positive cells. **(f, g)** Absence of *MII2* mRNA hybridization in sections incubated with a sense (s) *MII2* RNA probe (green) (g), as compared to an adjacent section incubated with an *MII2* cRNA (f). Bars in A, B = 500  $\mu$ m; in C-G = 200  $\mu$ m.

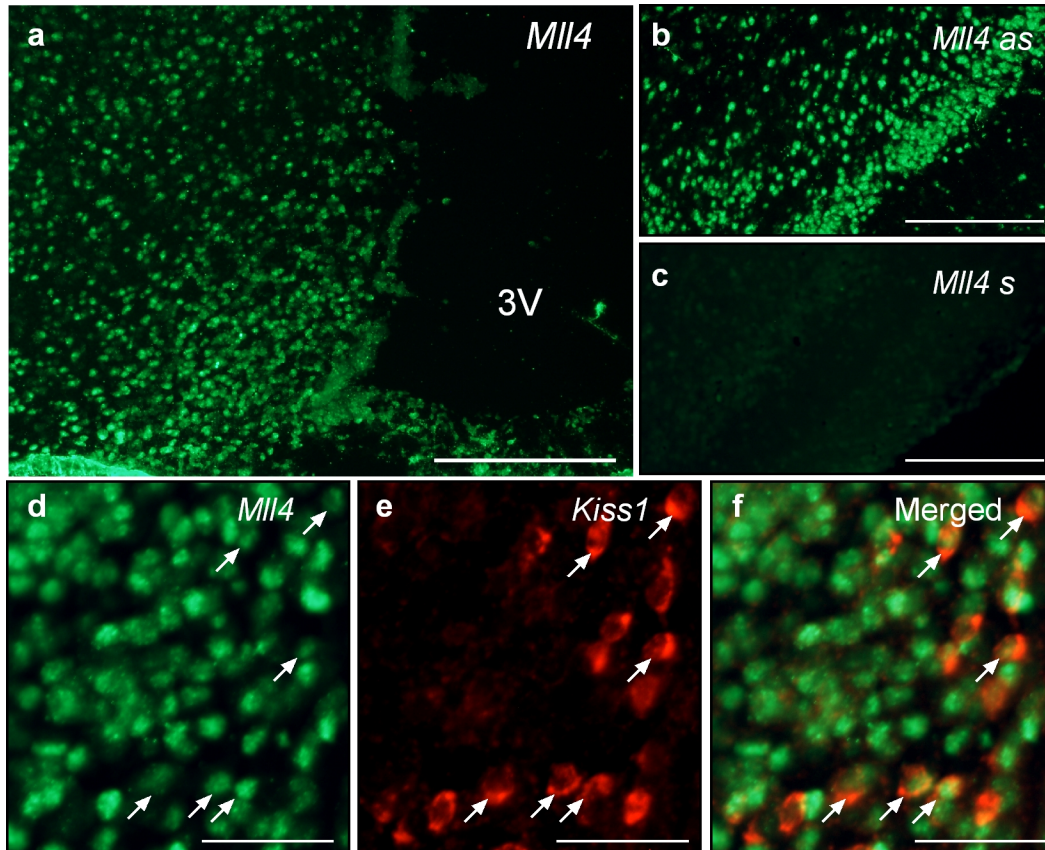

**Supplementary Fig. 4:** *MII4* mRNA-expressing cells in the prepubertal female rat hypothalamus. **(a)** Low magnification view depicting the distribution of *MII4* mRNA-containing cells in the MBH of a LJ female rat as assessed by FISH. **(b, c)** Absence of *MII4* mRNA hybridization in sections incubated with a sense (s) RNA probe (c), as compared to an adjacent section (b) incubated with an *MII4* cRNA probe (green). **(d-f)** Co-localization of *MII4* mRNA (d, f; green) and *Kiss1* mRNA (e, f; red) in KNDy neurons of the ARC. Arrows point to examples of double positive cells. Bars in a = 500  $\mu\text{m}$ ; in b-f = 200  $\mu\text{m}$ .

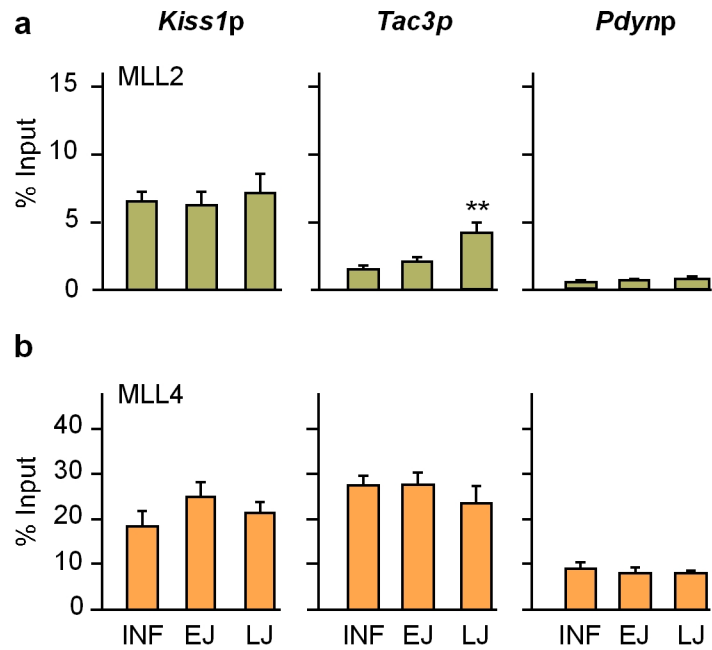

**Supplementary Fig. 5:** Recruitment of MLL2 and MLL4 to the promoter of KNDy genes. (**a**, **b**) Recruitment of MLL2 (**a**) and MLL4 (**b**) to the *Kiss1*, *Tac3* and *Pdyn* promoters in the MBH of LJ female rats. (n=7-8/group). Each bar represents the mean  $\pm$  SEM. (\*\* =  $P < 0.01$  vs. INF group, one-way ANOVA-SNK test).

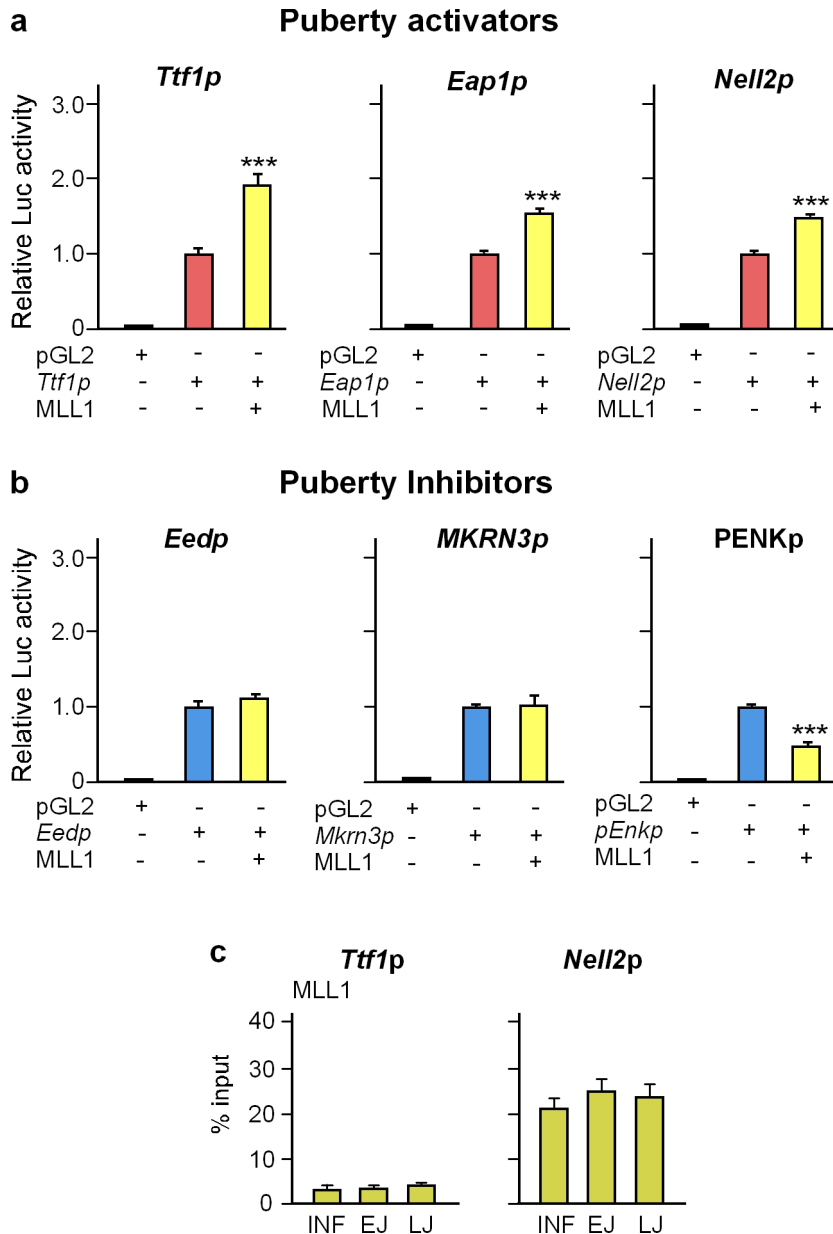

**Supplementary Fig. 6:** Effect of MLL1 on promoter activity and MLL1 binding to promoters during prepubertal development. **(a)** Effect of MLL1 on *Ttf1*, *Eap1* and *Nell2* promoter activity (n=6). **(b)** Effect of MLL1 on *Eed*, *MKRN3* and *PENK* promoter activity (n=6). Each bar represents the mean  $\pm$  s.e.m. \*\*\* =  $p < 0.001$  vs. cells transfected with luciferase constructs containing the indicated promoters; one-way ANOVA-Dunnett's test). **(c)** MLL1 recruitment to the *Ttf1* and *Nell2* promoters during prepubertal development (n=8). Each bar represents the mean  $\pm$  s.e.m. \*\*\* =  $P < 0.001$  vs. INF; one-way ANOVA- SNK.

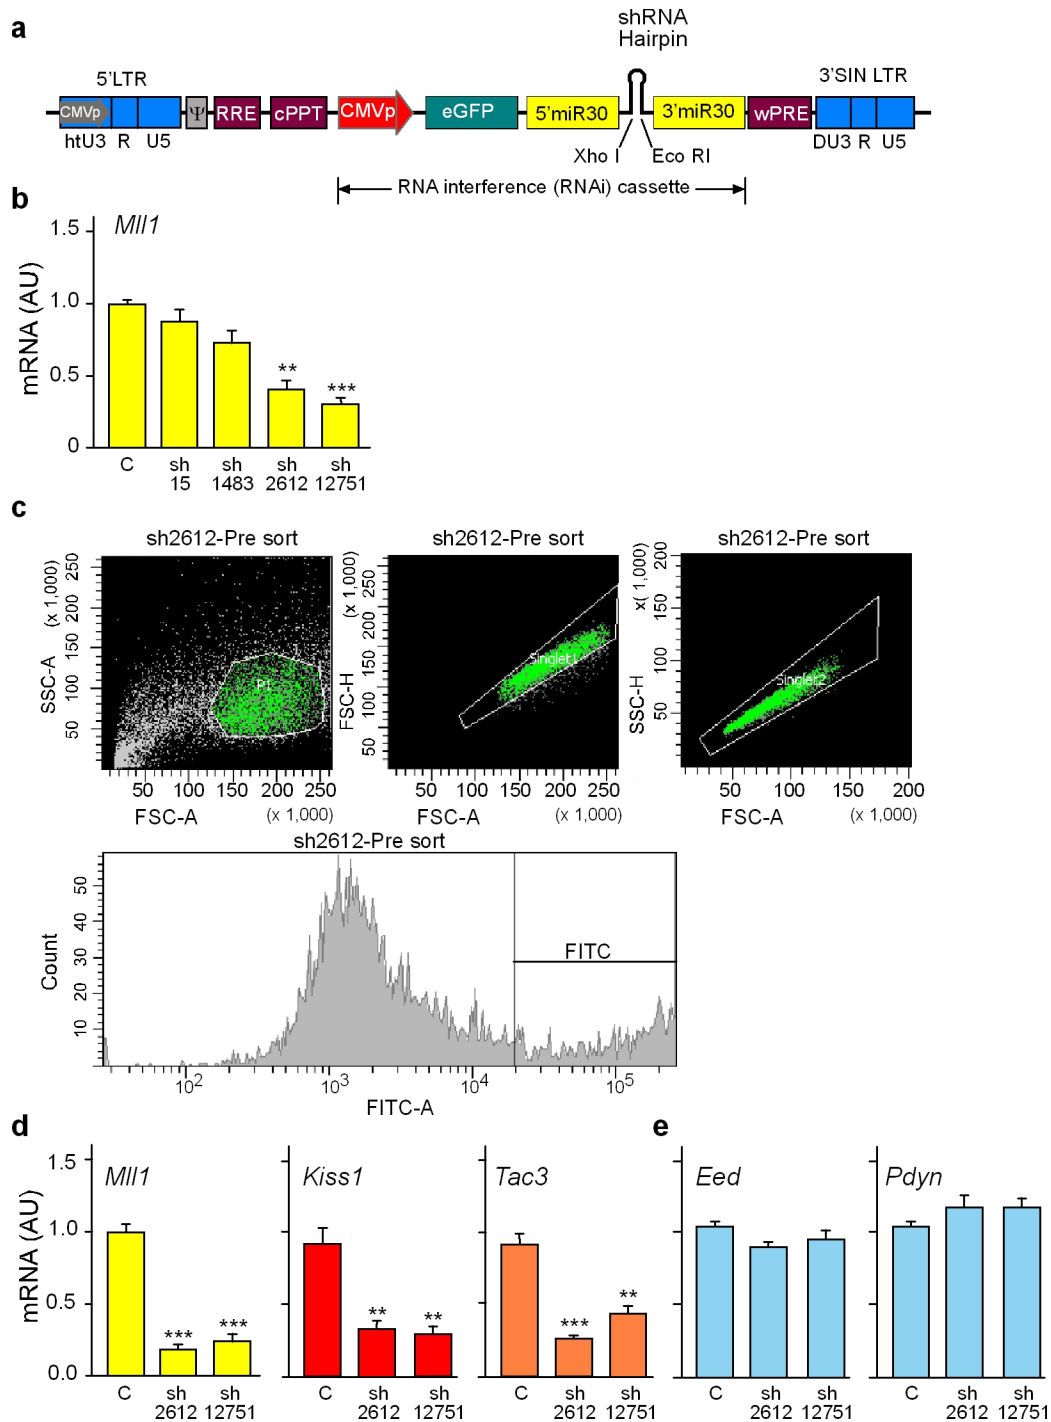

**Supplementary Fig. 7: RNAi-mediated silencing of the *MII1* gene.** (a) Diagram of the pPRIME lentivirus delivery vector<sup>1</sup> used to target shRNAs to *MII1* mRNA. The vector contains an artificial miR30 and replaceable hairpin structure able to accommodate up to three custom designed hairpins<sup>2</sup>; Xho I and Eco RI restriction enzyme sites are used as cloning sites to insert the

hairpin(s). The 5'LTR contains the heterologous U3 promoter (htU3), the repeat region/transcription initiation site (R), and the polyadenylation region (U5). The 3'LTR also contains R and U5 regions, but the 3'LTR U3 segment (DU3) bears a 400 bp deletion (SIN) that causes vector self-inactivation. The heterologous promoter htU3 is the cytomegalovirus promoter (CMVp); the CMVp also serves as the artificial miRNAi cassette promoter. The other components of this vector include the packaging signal ( $\Psi$ ), the Rev response element binding site (RRE), the central polypurine tract (cPPT), and the woodchuck-hepatitis-virus posttranslational regulatory element (wPRE). A sequence encoding eGFP is located immediately upstream of the miR30 sequence and is transcribed under the control of the CMV promoter. The vector carrying different shRNAs targeting *Mll1* is termed LV-shMll1-GFP. **(b)** Effect of different LV-shMll1-GFP constructs on *Mll1* mRNA levels in R22 hypothalamic cells, three days after infection. **(c)** Gating conditions for detection of GFP positive cells by flow cytometry. Cell isolation was performed by fluorescent activated cell sorting (FACS) capturing the population of cells (P1) displaying  $>10^4$  fluorescent units on the FITC channel. Purified sh2612- and sh12751-infected cells were expanded and used for subsequent experiments. **(d)** *Mll1*, *Kiss1* and *Tac3* mRNA levels in cells sorted after transduction with sh2612, sh12751 or a control LV-pPRIME plasmid (C) carrying a mutated shRNA against firefly luciferase<sup>1</sup>. **(e)** *Eed* and *Pdyn* mRNA content in the same cells. RNA expression data were normalized by dividing each individual value by the average of the C group. Bars are mean  $\pm$  s.e.m. (n= 3) (\*\* =  $P < 0.01$ , and \*\*\* =  $P < 0.001$  vs. C group; one-way ANOVA-Dunnett's test).



Supplementary Table 1. Primers used

Primers for RT-qPCR

| Species      | Gene           | Accession #    | Primers                   | Sequence                 | Amplicon (bp) |
|--------------|----------------|----------------|---------------------------|--------------------------|---------------|
| RAT          | <i>Cxhc1</i>   | NM_001079698.1 | rCxhc1-F-qPCR             | GGTGCTCTGTGAGCGGAGAT     | 106           |
|              |                |                | rCxhc1-R-qPCR             | GCAGTAGATGGGGCGTTCT      |               |
|              | <i>Dpy30</i>   | NM_173117      | rDpy30-f                  | AGTACGGGCTCACAGACAGC     | 165           |
|              |                |                | rDpy30-r                  | CCTTTGCGAGCACAGCAAGT     |               |
|              | <i>Eap1</i>    | NM_001012470.1 | rEAP1-F                   | ACTGTATCCTCTGCTCCGTCATC  | 82            |
|              |                |                | rEAP1-R                   | ACCGATCCAGGCCTTACC       |               |
|              | <i>Eed</i>     | NM_1106278     | rEed-RT-F                 | GAACAGCAACCCGGACCTCTCG   | 134           |
|              |                |                | rEed-RT-R                 | TTCCCTTTCCCCAGCTTTTCCTTC |               |
|              | <i>Gpr54</i>   | AF115516.1     | rGpr54-F                  | GTCGGAACTCACTGGTCAT      | 115           |
|              |                |                | rGpr54-R                  | ACGCAGCACAGAAGGAAAGT     |               |
|              | <i>Grik5</i>   | NM_031508.2    | rGrik5 mRNA F             | CCAGCCCTCCGTCACCAG       | 86            |
|              |                |                | rGrik5 mRNA R             | CCGGCATCTTCTCCCTCCTC     |               |
|              | <i>Grin2a</i>  | NM_012573.3    | rGrin2a mRNA F            | GGAACCCGCTAACCTGGTG      | 113           |
|              |                |                | rGrin2a mRNA R            | CCATGGTCGCCACTTAGGGT     |               |
|              | <i>Grin2d</i>  | NM_022797.1    | rGrin2d mRNA F            | AGCTCTGCGACCTGCTGT       | 190           |
|              |                |                | rGrin2d mRNA R            | CCAAGCTGCAGGAAGGTGGA     |               |
|              | <i>Kiss1</i>   | NM_181692      | rKiss1-RT-F               | TGGTGAACCCGTAACCCACAGGC  | 136           |
|              |                |                | rKiss1-RT-R               | CGCGGGCATGGCGATGTT       |               |
|              | <i>Mkm3</i>    | XM_218735.10   | rMkm3-F                   | AGAGGGAAGCGTCTGTTA       | 205           |
|              |                |                | rMkm3-R                   | AGCCTTAGCAGACCAGACCA     |               |
|              | <i>Mil1</i>    | XM_008766179.1 | rMil1-F-qPCR              | TAACGATGCTGGCCGTTTGC     | 198           |
|              |                |                | rMil1-R-qPCR              | GCAGGATGTGAGGCAGCAAC     |               |
|              | <i>Mil2</i>    | XM_006257393.2 | rMil2-F2                  | TCTCCATTGAGACACTGGTGG    | 197           |
|              |                |                | rMil2-R2                  | ACACTGCGAACAGGCCAAGA     |               |
|              | <i>Mil3</i>    | XM_008762670.1 | rMil3 F                   | GGAACCTTTGGCAGTGCCGC     | 197           |
|              |                |                | rMil3 R                   | GCTCACCAACACGCCAGCTT     |               |
|              | <i>Mil4</i>    | XM_008759254.1 | rMil4-F qPCR              | CTCCCAGAAGCTCCTTCCCG     | 171           |
|              |                |                | rMil4-R qPCR              | TCTCAAAGCGCAGGTGTGGA     |               |
|              | <i>Nell2</i>   | NM_031070.2    | rNell2 mRNA F             | GCGTACGTGGATGGCAAGTG     | 181           |
|              |                |                | rNell2 mRNA R             | GGCAATCTAAAGCCGGGCAG     |               |
|              | <i>pEnk</i>    | XM_006237835.1 | rpEnk -F                  | CTCGTAGCGTTGGTCTCTG      | 193           |
|              |                |                | rpEnk -R                  | GAACCTGGGCTTGACACCT      |               |
|              | <i>Pdyn</i>    | XM_017591511.1 | rPdyn-F                   | TCCCTGTGTGCAGTGAGGAC     | 118           |
| rPdyn-R      |                |                | CAAAAGCCCCGGCATGTCTC      |                          |               |
| <i>Ppia</i>  | M19533.1       | rCycA F        | GGCAAATGCTGGACAAACACAA    | 222                      |               |
|              |                | rCycA R        | GGTAAATGCCCGCAAGTCAAAGA   |                          |               |
| <i>Set1a</i> | XR_590498.1    | rSeta-F-qPCR   | CGGGTTGTAGAGCGGACCAT      | 118                      |               |
|              |                | rSETa-R-qPCR   | GTAGAGCGGACACGACCTCC      |                          |               |
| <i>Set1b</i> | XM_008760883.1 | rSet1b-F-qPCR  | GGAGGACGGTATCCGTGAGC      | 104                      |               |
|              |                | rSet1b-R-qPCR  | CTGGCACGGCTGCTATTGAG      |                          |               |
| <i>Tac3</i>  | NM_019162.2    | rTac3-F        | GCAGGGTGGGAGGCTCAGTAAGG   | 193                      |               |
|              |                | rTac3-R        | TGCCATAAGTCCCACAAAGAAGTCG |                          |               |
| <i>Tac3R</i> | NM_017053.1    | rTacR3-F       | GGCTGCCCTATCACGTGATTTCA   | 164                      |               |
|              |                | rTacR3-R       | AGCCTGCGCGGAATCTTTG       |                          |               |
| <i>Ttf1</i>  | NM_013093.1    | rTtf1-F        | GCTGCCGCGCCATCTCTG        | 233                      |               |
|              |                | rTtf1-R        | GGCGCGTCCCACATCTACCA      |                          |               |
| <i>Utx</i>   | XM_008773047.1 | rUtx-F-qPCR    | CCTCTGGACTGCAGCACGA       | 144                      |               |
|              |                | rUtx-R-qPCR    | TGCCTGGAGGTAAGCTCTGC      |                          |               |
| <i>Wdr5</i>  | XM_015149291   | rWdr5 F        | CGGATCCAGTCTCAGCCGT       | 143                      |               |
|              |                | rWdr5 R        | GGACACCGGAGGATTGTCTG      |                          |               |
| <i>Wdr82</i> | XM_001073342   | rWdr82-F-qPCR  | CCGCGAGAACTCGGACAAGA      | 118                      |               |
|              |                | rWdr82-R-qPCR  | CTTTGGTTTGCCTCCTGGC       |                          |               |
| <i>DPY30</i> | NM_001261093   | mkyDpy30 F     | ACTGGTATCCGGGACTGTGACTTG  | 200                      |               |
|              |                | mkyDpy30 R     | GCACGAGTTGGCAAAGACTGGAGAT |                          |               |

|               |              |                |                     |                       |     |
|---------------|--------------|----------------|---------------------|-----------------------|-----|
| Rhesus Monkey | GAPDH        | NM_001195426.1 | mkyGAPDH F          | AAGGGCATCCTGGGCTACA   | 68  |
|               |              |                | mkyGAPDH R          | GAAGAGTGGGTGTCGCTGTTG |     |
|               | MLL1         | XM_015115824   | mkyMLL1-F           | TGTTGCCCTTGGCCGAAAAC  | 189 |
|               |              |                | mkyMLL1-R           | TGGGTGGAGCAAGAGGTTC   |     |
| SETD1A        | XM_015125982 | mkySETD1A-R    | CACGAGTGGGTCTGTTTGC | 161                   |     |
|               |              | mkySETD1A-F    | GTGTCATGGTCCACCCGAA |                       |     |

#### Primers for ChIP-qPCR

| Species | Gene           | Accession # | Primers              | Sequence                          | Amplicon (bp) |
|---------|----------------|-------------|----------------------|-----------------------------------|---------------|
| RAT     | Eed            | NM_1106278  | rEed-CHIP F          | AATAAAGGCACGCGACCCCATAC           | 109           |
|         |                |             | rEed-CHIP R          | TGCAAAAGAAAGTCGAGCCAATG           |               |
|         | Kiss1          | NM_181692.1 | rKiss1-CHIP F        | TCGGGCAGCCAGATAGAGGAAGC           | 91            |
|         |                |             | rKiss1-CHIP R        | TTGAGGGCCGAGGGAGAAGAG             |               |
|         |                |             | rKiss1 Site1-F       | AGCCCCACCCATCTCTGAAGT             | 142           |
|         |                |             | rKiss1 Site1-R       | CTGGACCCGGATACGATGCGATGG          |               |
|         |                |             | rKiss1 Site2-F       | GGGGCAGTGGGGCCACCGCTGTA           | 94            |
|         |                |             | rKiss1 Site2-R       | AACTCAGTCCTCCGGTACCTCCGCAAATCTGTG |               |
|         | Nell2          | NM_031070.2 | rNell2CHIP F         | AGCGGGCTCCAAGTTCG                 | 190           |
|         |                |             | rNell2CHIP R         | TGGCGTGCATCGTCTCAG                |               |
|         | Pdyn           | NM_019374.3 | rPdynCHIP F          | CTGCCTTCTCCTACTTTTGTCTCTGTTTT     | 109           |
|         |                |             | rPdynCHIP R          | CGGGGGTGGATTCTCGGTGTAG            |               |
|         | Tac3           | NM_019162.2 | rTAC2 CHIP-F         | ACGTGCGTGTCTGGGTATGTGA            | 123           |
|         |                |             | rTAC2 CHIP-R         | GGAGGGTTTGGGGGAGTCCG              |               |
| Ttf1    | XM_006233882.3 | rTtf1CHIP F | GTCTTGTGCTTTAGCGCTTA | 125                               |               |
|         |                | rTtf1CHIP R | GTACACGTAACGGAGTGGAC |                                   |               |

#### Primers for FISH

| Species | Gene  | Accession #    | Primers       | Sequence                 | Amplicon (bp) |
|---------|-------|----------------|---------------|--------------------------|---------------|
| RAT     | Kiss1 | NM_181692.1    | rKiss1-F      | ATGATCTCGCTGGCTTCTTGGCAG | 393           |
|         |       |                | rKiss1-R      | TCAGCCCCGTGCCGCCCGCCGCGC |               |
|         | Mll1  | XM_008766179.1 | rMll1 ISH -F2 | TAAACCGACCCCTTCTGCTATGT  | 522           |
|         |       |                | rMll1 ISH -R2 | TCTATGAACCGTCGGGGAGTCTT  |               |
|         | Mll2  | XM_008765859.2 | rMll2-F-ISH   | AAGCCACCGGTGCTCTCTTT     | 439           |
|         |       |                | rMll2-R-ISH   | TGGGAAGGTGTGGCTCAGTG     |               |
|         | Mll3  | XM_006235840.3 | rMll3 ISH F   | CGGCCCGTGTGTGTCATCAGG    | 425           |
|         |       |                | rMll3 ISH R   | CGGTGCGTTCAGCTCTCCAGTG   |               |
|         | Mll4  | XM_008759254.2 | rMll4 ISH F   | ACCCCCACCTCCACCCCACTA    | 630           |
|         |       |                | rMll4 ISH R   | CCGCGCTCCACTCATTCCACTAAA |               |
|         | Set1b | XR_001836008.1 | rSet1b-F-ISH  | CGGTGCCCTCACCCCTATTT     | 535           |
|         |       |                | rSet1b-R-ISH  | CCCACCATCCTGGCCTACTG     |               |

#### 22-mer oligodeoxynucleotides encoding shRNAs

| Species | Gene | Accession #  | Primers       | Sequence               |
|---------|------|--------------|---------------|------------------------|
| Rat     | Mll1 | XM_008766179 | shrMLL1-15    | CCGGGAACGTGTGTAATCGGCC |
|         |      |              | shrMLL1-1483  | TAGCAGTCCCAGTATCGATACC |
|         |      |              | shrMLL1-2612  | GAGCTGTCCAAGATCGCGATA  |
|         |      |              | shrMLL1-12751 | GAGGACACTCCTACTCGGTATA |

#### Primers to detect shMLL1-mediated MLL1 mRNA knock-down

| Species | Gene | Accession #  | Primers       | Sequence                        | Amplicon (bp) |
|---------|------|--------------|---------------|---------------------------------|---------------|
| Rat     | Mll1 | XM_008766179 | shMLL1 15-F   | GCAGCCGCGCCGACTGGAAGTG          | 190           |
|         |      |              | shMLL1 15-R   | CCGCTCCGGGCTCCAGGGCTTCC         |               |
|         |      |              | shMLL1 1483-F | CCCAGCACTCCTCTCAGATGTCTTCAG     | 199           |
|         |      |              | shMLL1 1483-R | GTAATGACAGGAGAGGCAGACGGTATTCG   |               |
|         |      |              | shMLL1 2612-F | TACTTTTCTTCTCACTCCCTAACTCAGTCTG |               |
|         |      |              |               |                                 | 182           |

|  |  |                |                              |     |
|--|--|----------------|------------------------------|-----|
|  |  | shMLL1 2612-R  | GTCCTCCGGGGCTGTGTCTT         | 192 |
|  |  | shMLL1 12751-F | AGCGGCTTCTCTCCATTCTTCTTTATTC | 193 |
|  |  | shMLL1 12751-R | GTCCTGCCCACTTCCCCACCTG       |     |

**Oligodeoxynucleotides encoding sgRNAs targeting *Kiss1* enhancer Site1**

| Species | Gene         | Accession # | Primers        | Sequence                    | Position upstream TSS |
|---------|--------------|-------------|----------------|-----------------------------|-----------------------|
| RAT     | <i>Kiss1</i> | JX139031    | rKiss1enh g1-F | CACCGCCCTAGGAATAGAAGAGAGGAC | -3182                 |
|         |              |             | rKiss1enh g1-R | AAACGTCTCTCTTCTATTCTAGGGC   |                       |
|         |              |             | rKiss1enh g2-F | CACCGCCCATGTGAGGTACTTCAGAG  | -2716                 |
|         |              |             | rKiss1enh g2-R | AAACCTCTGAAGTACCTCACATGGGC  |                       |
|         |              |             | rKiss1enh g3-F | CACCGTTCCAGCCCCCTCGCCAACAAT | -2433                 |
|         |              |             | rKiss1enh g3-R | AAACATTGTTGGCGAGGGGGCTGGAAC |                       |
|         |              |             | rKiss1enh g4-F | CACCGTCCCCACCCTGACTTTATGCAG | -2205                 |
|         |              |             | rKiss1enh g4-R | AAACCTGCATAAAGTCAGGGTGGGGAC |                       |
|         |              |             | rKiss1enh g5-F | CACCGTCTACCATCCAGGACACGAGG  | -1694                 |
|         |              |             | rKiss1enh g5-R | AAACCCTCGTGTCTGGATGGTAGGAC  |                       |

**Primers for PCR-cloning of KRAB domain**

|                 |                                    |
|-----------------|------------------------------------|
| KRAB F-infusion | AAAGAAAAGGGATCCGGAGGGATGGATGCTAAG  |
| KRAB R-infusion | CGTATGGGTAGGATCCGGGCTCTTCTCCCTTCTC |

**Primers to detect dCas9 mRNA**

|             |                          |
|-------------|--------------------------|
| dCas9 P2 Fw | TTACCGCCCGAAAGAGATTATTG  |
| dCas9 P2 Rv | GCTCGGAGTTCAGATTGGTCAGTT |

**Supplementary Table 2. Promoters used in gene reporter assays**

| <b><i>Gene Promoter</i></b> | <b><i>Species</i></b> | <b><i>Accession #</i></b> | <b><i>Size (bp)</i></b> | <b><i>From*</i></b> | <b><i>To*</i></b> |
|-----------------------------|-----------------------|---------------------------|-------------------------|---------------------|-------------------|
| <i>Eap1</i>                 | rat                   | NM_001012470.1            | 2556                    | -2345               | +210              |
| <i>Eed</i>                  | rat                   | NM_001106278.2            | 2107                    | -1850               | +256              |
| <i>KISS1</i>                | human                 | NM_002256.3               | 1339                    | -1317               | +22               |
| <i>MKRN3</i>                | human                 | NM_005664.3               | 439                     | -446                | -7                |
| <i>Nell2</i>                | mouse                 | NM_001289653.1            | 881                     | -851                | +30               |
| <i>PDYN</i>                 | human                 | NM_001190892.1            | 790                     | -450                | +340              |
| <i>PENK</i>                 | human                 | NM_001135690.2            | 686                     | -479                | +207              |
| <i>TAC3</i>                 | human                 | NM_001178054.1            | 835                     | -766                | +69               |
| <i>Ttf1</i>                 | rat                   | XM_006233882.3            | 5181                    | -5180               | +1                |

\* With respect to the transcription start site (TSS)

**Supplementary Table 3. Primary antibodies used**

| <i>Target</i>      | <i>Host</i> | <i>Source</i>   | <i>Catalog #</i> | <i>Use</i> |
|--------------------|-------------|-----------------|------------------|------------|
| Beta-Galactosidase | Mouse       | ICN Biomedicals | 55976            | ChIP       |
| Beta-Galactosidase | Rabbit      | Cortex Biochem  | CR7001RP2        | ChIP       |
| EED                | Mouse       | Millipore       | 05-1320          | ChIP       |
| GFP                | Goat        | abcam           | ab6673           | IHC        |
| H3K4me1            | Rabbit      | Active Motif    | 61633            | ChIP       |
| H3K4me2            | Rabbit      | abcam           | ab7766           | ChIP       |
| H3K4me3            | Rabbit      | Active Motif    | 39159            | ChIP       |
| H3K9me3            | Mouse       | Active Motif    | 61013            | ChIP       |
| H3K27ac            | Rabbit      | Active Motif    | 39133            | ChIP       |
| H3K27me3           | Rabbit      | Active Motif    | 39155            | ChIP       |
| p300               | Mouse       | abcam           | ab14984          | ChIP       |
| MLL1               | Rabbit      | Ali Shilatifard | 569/Rb065        | ChIP       |
| MLL2               | Rabbit      | Ali Shilatifard | 401/Rb9173       | ChIP       |
| MLL3               | Rabbit      | Ali Shilatifard | 564              | ChIP       |
| MLL4               | Rabbit      | Ali Shilatifard | 403/Rb823        | ChIP       |

## References

1. Stegmeier,F., Hu,G., Rickles,R.J., Hannon,G.J., & Elledge,S.J. A lentiviral microRNA-based system for single-copy polymerase II-regulated RNA interference in mammalian cells. *Proc. Natl. Acad. Sci. U. S. A* **102**, 13212-13217 (2005).
2. Sun,D., Melegari,M., Sridhar,S., Rogler,C.E., & Zhu,L. Multi-miRNA hairpin method that improves gene knockdown efficiency and provides linked multi-gene knockdown. *BioTechniques* **41**, 59-63 (2006).
